# Supplementary material for: Continuous low-dose antibiotic prophylaxis for adults with repeated urinary tract infections (AnTIC): a randomised, open-label trial
Source: PubMed Central journal article supplement (PMC6105581; doi:10.1016/s1473-3099(18)30279-2), 2018-09
Supplement: mmc1.pdf [file mmc1.pdf]

# THE LANCET

## Infectious Diseases

### Supplementary appendix

This appendix formed part of the original submission and has been peer reviewed. We post it as supplied by the authors.

Supplement to: Fisher H, Oluboyede Y, Chadwick T, et al. Continuous low-dose antibiotic prophylaxis for adults with repeated urinary tract infections (AnTIC): a randomised, open-label trial. *Lancet Infect Dis* 2018; published online June 28. [http://dx.doi.org/10.1016/S1473-3099\(18\)30279-2](http://dx.doi.org/10.1016/S1473-3099(18)30279-2).

**Web Supplementary Material**

**Continuous low-dose antibiotic prophylaxis for adults with repeated urinary tract infections (AnTIC): a randomised, open-label trial**

|                                                                                         | <b>Prophylaxis<br/>(included in primary<br/>analysis n = 181)</b> | <b>No prophylaxis<br/>(included in primary analysis n<br/>= 180)</b> |
|-----------------------------------------------------------------------------------------|-------------------------------------------------------------------|----------------------------------------------------------------------|
| <b>Age (years)</b>                                                                      | 59.3 (16.5)                                                       | 59.9 (15.5)                                                          |
| <b>Weight (kg)</b>                                                                      | 78.0 (16.2)                                                       | 81.4 (16.1)                                                          |
| <b>Stratification factors at randomisation</b>                                          |                                                                   |                                                                      |
| <b>Sex</b>                                                                              |                                                                   |                                                                      |
| Male                                                                                    | 101 (55.8%)                                                       | 104 (57.8%)                                                          |
| Female                                                                                  | 80 (44.2%)                                                        | 76 (42.2%)                                                           |
| <b>Number UTI episodes in 12 months prior to randomisation</b>                          |                                                                   |                                                                      |
| <4                                                                                      | 69 (38.1%)                                                        | 68 (37.8%)                                                           |
| ≥4                                                                                      | 112 (61.9%)                                                       | 112 (62.2%)                                                          |
| <b>Cause of bladder dysfunction</b>                                                     |                                                                   |                                                                      |
| Neurological                                                                            | 71 (39.2%)                                                        | 71 (39.4%)                                                           |
| Non-neurological                                                                        | 110 (60.8%)                                                       | 109 (60.6%)                                                          |
| <b>Creatinine clearance (mL/min)</b>                                                    | 89.2 (68.6, 119.8)                                                | 100.1 (74.5, 122.3)                                                  |
| <b>Type of intermittent catheterisation</b>                                             |                                                                   |                                                                      |
| By self                                                                                 | 179 (98.9%)                                                       | 177 (98.3%)                                                          |
| By spouse or carer                                                                      | 1 (0.6%)                                                          | 2 (1.1%)                                                             |
| Missing                                                                                 | 1 (0.6%)                                                          | 1 (0.6%)                                                             |
| <b>Planned future duration of need for intermittent catheterisation</b>                 |                                                                   |                                                                      |
| Between 1 and 2 years                                                                   | 0 (0.0%)                                                          | 2 (1.1%)                                                             |
| Between 2 and 5 years                                                                   | 0 (0.0%)                                                          | 1 (0.6%)                                                             |
| Indefinite                                                                              | 163 (90.1%)                                                       | 164 (91.1%)                                                          |
| Not known                                                                               | 17 (9.4%)                                                         | 12 (6.7%)                                                            |
| Missing                                                                                 | 1 (0.6%)                                                          | 1 (0.6%)                                                             |
| <b>Route of intermittent catheterisation</b>                                            |                                                                   |                                                                      |
| Urethra                                                                                 | 174 (96.1%)                                                       | 175 (97.2%)                                                          |
| Mitrofanoff catheterisable stoma                                                        | 6 (3.3%)                                                          | 4 (2.2%)                                                             |
| Missing                                                                                 | 1 (0.6%)                                                          | 1 (0.6%)                                                             |
| <b>Catheterisation details:</b>                                                         |                                                                   |                                                                      |
| <b>Type of catheter used</b>                                                            |                                                                   |                                                                      |
| Single use                                                                              | 174 (96.1%)                                                       | 175 (97.2%)                                                          |
| Re-useable                                                                              | 6 (3.3%)                                                          | 4 (2.2%)                                                             |
| Missing                                                                                 | 1 (0.6%)                                                          | 1 (0.6%)                                                             |
| <b>Hydrophilic coated catheter used?</b>                                                |                                                                   |                                                                      |
| No                                                                                      | 7 (3.9%)                                                          | 7 (3.9%)                                                             |
| Yes                                                                                     | 169 (93.4%)                                                       | 172 (95.6%)                                                          |
| Missing                                                                                 | 5 (2.8%)                                                          | 1 (0.6%)                                                             |
| <b>Frequency of CISC per 24 hours</b>                                                   | 3.8 (2.2)                                                         | 4.2 (3.0)                                                            |
| <b>Main functional reason for requiring intermittent catheterisation</b>                |                                                                   |                                                                      |
| Bladder outlet obstruction                                                              | 45 (24.9%)                                                        | 48 (26.7%)                                                           |
| Bladder failure (underactivity)                                                         | 122 (67.4%)                                                       | 117 (65.0%)                                                          |
| Bladder augmentation /replacement                                                       | 12 (6.6%)                                                         | 14 (7.8%)                                                            |
| Missing                                                                                 | 2 (1.1%)                                                          | 1 (0.6%)                                                             |
| <b>Urinary Infection:</b>                                                               |                                                                   |                                                                      |
| <b>Episodes of UTI experienced by participant in 12 months prior to randomisation</b>   | 4.0 (3.0, 6.0)                                                    | 4.0 (3.0, 7.0)                                                       |
| <b>Positive urine culture reports in 12 months prior to randomisation</b>               | 2.0 (1.0, 4.0)                                                    | 2.0 (1.0, 4.0)                                                       |
| <b>Months use of antibiotic prophylaxis for UTI in 12 months prior to randomisation</b> | 0.0 (0.0, 1.0)                                                    | 0.0 (0.0, 1.0)                                                       |
| <b>Central laboratory culture of urine at baseline</b>                                  |                                                                   |                                                                      |
| Negative                                                                                | 81(44.8%)                                                         | 74 (41.1%)                                                           |
| Positive                                                                                | 73 (40.2%)                                                        | 72 (40.0%)                                                           |
| Missing                                                                                 | 27 (14.9%)                                                        | 34 (18.9%)                                                           |

Supplementary Table 1: Baseline characteristics for participants included in the primary analysis only. Data are n (%), median [Inter quartile range (IQR)] or mean [standard deviation (SD)].

|                                                                                      | Prophylaxis<br>n = 181<br>(included in<br>primary analysis ) | No prophylaxis<br>n = 180<br>(included in<br>primary analysis) | IRR (95% CI)                           | p-value         |
|--------------------------------------------------------------------------------------|--------------------------------------------------------------|----------------------------------------------------------------|----------------------------------------|-----------------|
| <b>Symptomatic, antibiotic treated UTI (primary outcome)</b>                         |                                                              |                                                                |                                        |                 |
| Sex                                                                                  | n = 181                                                      | n = 180                                                        |                                        |                 |
| Female                                                                               |                                                              |                                                                | 1.11 (0.95, 1.29)                      | 0.18            |
| Prophylaxis group                                                                    |                                                              |                                                                | 0.50 (0.43, 0.58)                      | <0.0001         |
| Previous frequency of UTI                                                            | n = 181                                                      | n = 180                                                        |                                        |                 |
| ≥4                                                                                   |                                                              |                                                                | 1.94 (1.63, 2.31)                      | <0.0001         |
| Prophylaxis group                                                                    |                                                              |                                                                | 0.50 (0.42, 0.58)                      | <0.0001         |
| Neurological bladder dysfunction                                                     | n = 181                                                      | n = 180                                                        |                                        |                 |
| No                                                                                   |                                                              |                                                                | 0.97 (0.83, 1.13)                      | 0.68            |
| Prophylaxis group                                                                    |                                                              |                                                                | 0.50 (0.43, 0.58)                      | <0.0001         |
| Age                                                                                  | n = 181                                                      | n = 180                                                        |                                        |                 |
| Prophylaxis group                                                                    |                                                              |                                                                | 1.00 (1.00, 1.00)<br>0.52 (0.44, 0.61) | 0.95<br><0.0001 |
| Functional cause of poor bladder emptying<br>(reference: Bladder outlet obstruction) | n = 179                                                      | n = 179                                                        |                                        |                 |
| Bladder failure (underactivity)                                                      |                                                              |                                                                | 1.17 (0.98, 1.40)                      | 0.09            |
| Bladder augmentation/replacement                                                     |                                                              |                                                                | 1.39 (1.03, 1.87)                      | 0.03            |
| Prophylaxis group                                                                    |                                                              |                                                                | 0.52 (0.44, 0.61)                      | <0.0001         |
| Use of hydrophilic catheter                                                          | n = 176                                                      | n = 179                                                        |                                        |                 |
| Yes                                                                                  |                                                              |                                                                | 1.43 (0.90, 2.29)                      | 0.13            |
| Prophylaxis group                                                                    |                                                              |                                                                | 0.52 (0.44, 0.61)                      | <0.0001         |
| Frequency of CISC                                                                    | n = 181                                                      | n = 179                                                        |                                        |                 |
| Prophylaxis group                                                                    |                                                              |                                                                | 1.00 (0.97, 1.02)<br>0.52 (0.44, 0.61) | 0.81<br><0.0001 |
| Use of prophylaxis in previous 12 months                                             | n = 181                                                      | n = 180                                                        |                                        |                 |
| Prophylaxis group                                                                    |                                                              |                                                                | 1.03 (1.00, 1.05)<br>0.52 (0.44, 0.60) | 0.08<br><0.0001 |
| Kidney function at baseline (eGFR)                                                   | n = 181                                                      | n = 176                                                        |                                        |                 |
| Prophylaxis group                                                                    |                                                              |                                                                | 1.00 (1.00, 1.00)<br>0.52 (0.44, 0.61) | 0.14<br><0.0001 |
| Baseline bacteriuria                                                                 | n = 149                                                      | n = 149                                                        |                                        |                 |
| Yes                                                                                  |                                                              |                                                                | 0.92 (0.78, 1.09)                      | 0.32            |
| Prophylaxis group                                                                    |                                                              |                                                                | 0.52 (0.44, 0.62)                      | <0.0001         |

**Supplementary Table 2: Additional modelling of the primary outcome (incidence of symptomatic, antibiotic treated UTI). Each row displays the results of fitting a separate multivariate model including group and covariate.**

|                                                              | Prophylaxis<br>(n = 203)<br>(eligible n = 181) | No prophylaxis<br>(n = 201)<br>(eligible n = 180) |                   |         |
|--------------------------------------------------------------|------------------------------------------------|---------------------------------------------------|-------------------|---------|
|                                                              | Incidence rate                                 | Incidence rate                                    | IRR (95% CI)      | p-value |
| <b>Symptomatic, antibiotic treated UTI (primary outcome)</b> |                                                |                                                   |                   |         |
| All eligible                                                 | 1.3 (1.1, 1.6)                                 | 2.6 (2.3, 2.9)                                    | 0.52 (0.42, 0.65) | <0.0001 |
| Subgroup: baseline episodes of UTI < 4                       | 0.8 (0.6, 1.1)                                 | 1.7 (1.4, 2.2)                                    | 0.46 (0.31, 0.69) | 0.52‡   |
| Subgroup: baseline episodes of UTI ≥ 4                       | 1.7 (1.3, 2.0)                                 | 3.1 (2.7, 3.6)                                    | 0.54 (0.42, 0.70) |         |

**Supplementary Table 3: Sensitivity analysis for primary outcome (incidence of symptomatic antibiotic-treated UTI over 12 months) using negative binomial regression. ‡For interaction between subgroups (<4 and ≥4 infections at baseline) and treatment group.**

|                                                              | Prophylaxis<br>(n = 203) | No prophylaxis<br>(n = 201) |                   |         |
|--------------------------------------------------------------|--------------------------|-----------------------------|-------------------|---------|
|                                                              | Incidence rate           | Incidence rate              | IRR (95% CI)      | p-value |
| <b>Symptomatic, antibiotic treated UTI (primary outcome)</b> |                          |                             |                   |         |
| All eligible                                                 | 1.4 (1.1, 1.6)           | 2.6 (2.3, 2.9)              | 0.53 (0.45, 0.62) | <0.0001 |
| Subgroup: baseline episodes of UTI < 4                       | 0.8 (0.6, 1.1)           | 1.7 (1.4, 2.2)              | 0.47 (0.34, 0.65) | 0.43‡   |
| Subgroup: baseline episodes of UTI ≥ 4                       | 1.7 (1.3, 2.3)           | 3.1 (2.7, 3.6)              | 0.55 (0.46, 0.65) |         |

**Supplementary Table 4: Sensitivity analysis for primary outcome (incidence of symptomatic antibiotic-treated UTI over 12 months using strict intention-to-treat definition. ‡For interaction between subgroups (<4 and ≥4 infections at baseline) and treatment group.**

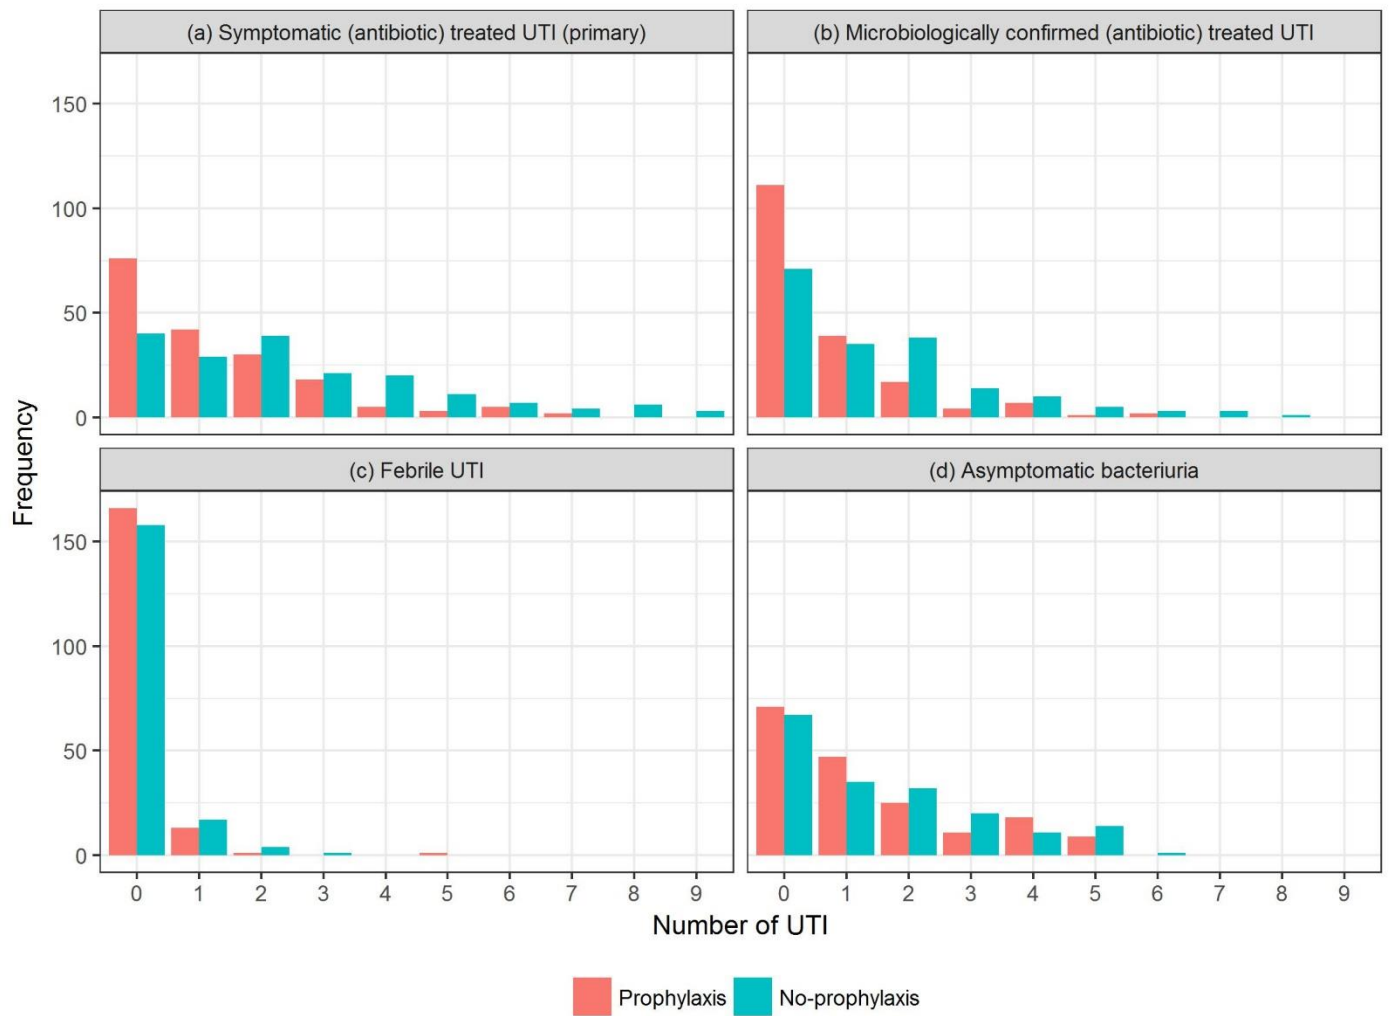

**Supplementary Figure 1:** Bar charts showing frequency distribution for occurrence of (a) primary outcome (symptomatic antibiotic-treated UTI) and secondary outcomes (b) microbiologically confirmed UTI, (c) febrile UTI and (d) asymptomatic bacteriuria over 12 months of trial duration.

|                      | Prophylaxis<br>(n = 203) | No prophylaxis<br>(n = 201) | Comparison between groups                      |                 |
|----------------------|--------------------------|-----------------------------|------------------------------------------------|-----------------|
|                      |                          |                             | t-test<br>mean difference (95%<br>CI), p-value | ANCOVA* p-value |
| <b>GFR</b>           |                          |                             |                                                |                 |
| Baseline             | 86.6 (30.2) (n=200)      | 88.0 (26.1) (n=197)         | -                                              | -               |
| 12 months            | 82.3 (30.0) (n=123)      | 83.3 (27.6) (n=140)         | -                                              | -               |
| Change from baseline | -2.1 (15.0) (n=123)      | -3.4 (14.2) (n=138)         | 1.29 (-2.3, 4.9)<br>p = 0.48                   | p = 0.48        |
| <b>ALT</b>           |                          |                             |                                                |                 |
| Baseline             | 24.7 (19.9) (n=198)      | 24.1 (15.6) (n=188)         | -                                              | -               |
| 12 months            | 26.1 (19.1) (n=118)      | 24.0 (14.1) (n=135)         | -                                              | -               |
| Change from baseline | 1.2 (19.5) (n=117)       | -0.3 (14.7) (n=128)         | 1.5 (-2.8, 5.8)<br>p = 0.49                    | p = 0.50        |

**Supplementary Table 4: Mean [standard deviation (SD)] glomerular filtration rate (GFR) and alanine transaminase (ALT) at baseline and 12 months, with comparison between groups of change from baseline. \*Adjusted for stratification factors at randomisation.**

| Domain        | Prophylaxis<br>(n = 203) | No prophylaxis<br>(n = 201) | Comparison between groups                      |                 |
|---------------|--------------------------|-----------------------------|------------------------------------------------|-----------------|
|               |                          |                             | t-test<br>mean difference (95%<br>CI), p-value | ANCOVA* p-value |
| Effectiveness | 78.0 (19.1) (n=144)      | 66.3 (19.5) (n=108)         | 11.7 (6.8, 16.5)<br>p < 0.001                  | p < 0.001       |
| Side-effects  | 67.4 (23.4) (n=22)       | 67.2 (24.2) (n=32)          | 0.24 (-13.0, 13.5)<br>p = 0.97                 | p = 0.94        |
| Convenience   | 88.9 (13.9) (n=144)      | 78.2 (21.4) (n=109)         | 10.7 (6.4, 15.1)<br>p < 0.001                  | p < 0.001       |
| Overall       | 73.8 (25.4) (n=143)      | 63.0 (24.3) (n=109)         | 10.8 (4.5, 17.0)<br>p = 0.001                  | p < 0.001       |

**Supplementary Table 5: Treatment satisfaction questionnaire for medication (TSQM) scores at 12 months, with comparisons by group (maximum rating = 100 for each domain). \*Adjusted for stratification factors used at randomisation**

|                                                                                                                                                                                                                   | Nitrofurantoin<br>(n = 71) | Trimethoprim<br>(n = 92) | Cefalexin<br>(n = 33) |
|-------------------------------------------------------------------------------------------------------------------------------------------------------------------------------------------------------------------|----------------------------|--------------------------|-----------------------|
| <b>Number of participants who reported adverse events in a health-care record review, completed by local trial research staff and assessed as being related to (or possibly related to) prophylaxis treatment</b> |                            |                          |                       |
| 0 events                                                                                                                                                                                                          | 62 (87%)                   | 85 (92%)                 | 30 (91%)              |
| 1 events                                                                                                                                                                                                          | 8 (11%)                    | 6 (7%)                   | 3 (9%)                |
| 2 events                                                                                                                                                                                                          | 0 (0%)                     | 1 (1%)                   | 0 (0%)                |
| 3 events                                                                                                                                                                                                          | 1 (1%)                     | 0 (0%)                   | 0 (0%)                |
| <b>Number of participants who reported adverse events in each 3-monthly participant review, completed by local trial research staff and the participant</b>                                                       |                            |                          |                       |
| 1 month                                                                                                                                                                                                           | 6 (8%)                     | 9 (10%)                  | 2 (6%)                |
| 3 month                                                                                                                                                                                                           | 9 (13%)                    | 10 (11%)                 | 1 (3%)                |
| 6 month                                                                                                                                                                                                           | 9 (13%)                    | 7 (8%)                   | 1 (3%)                |
| 9 month                                                                                                                                                                                                           | 3 (4%)                     | 4 (4%)                   | 2 (6%)                |
| 12 month                                                                                                                                                                                                          | 3 (4%)                     | 6 (7%)                   | 1 (3%)                |

**Supplementary Table 6: Number of adverse events associated with prophylactic antibiotic by initial choice of agent, prophylaxis group only, n = 196 (7 participants in the prophylaxis group did not receive prophylaxis).**

|                       | Initial agent<br>(n = 196) | Switched agent ever | Switched to nitrofurantoin | Switched to trimethoprim | Switched to cefalexin |
|-----------------------|----------------------------|---------------------|----------------------------|--------------------------|-----------------------|
| <b>Initial agent:</b> |                            |                     |                            |                          |                       |
| Nitrofurantoin        | 71 (36%)                   | 8                   | -                          | 6                        | 2                     |
| Trimethoprim          | 92 (47%)                   | 15                  | 7                          | -                        | 8                     |
| Cefalexin             | 33 (17%)                   | 2                   | 1                          | 1                        | -                     |

**Supplementary Table 7: Choice of initial agent and agent switched to during trial (no participants switched more than once), prophylaxis group only, n = 196 (7 participants in the prophylaxis group did not receive prophylaxis).**

| Trial allocated group                                                   |                    | Prophylaxis<br>(n = 203) | No prophylaxis<br>(n = 201) |
|-------------------------------------------------------------------------|--------------------|--------------------------|-----------------------------|
| <b>Management strategy in use at 18 months</b>                          | Prophylaxis        | 72 (35.5%)               | 18 (9.0%)                   |
|                                                                         | No prophylaxis     | 36 (17.7%)               | 72 (35.8%)                  |
|                                                                         | Missing            | 95 (46.8%)               | 111 (55.2%)                 |
| <b>Urine culture during asymptomatic state at 18 months</b>             | Positive           | 61 (30.1%)               | 35 (17.4%)                  |
|                                                                         | Negative           | 23 (11.3%)               | 29 (14.4%)                  |
|                                                                         | No sample received | 119 (58.6%)              | 137 (68.2%)                 |
| <b><i>Escherichia coli</i> isolated from perianal swab at 18 months</b> | Positive           | 27 (13.3%)               | 15 (7.5%)                   |
|                                                                         | Negative           | 44 (21.7%)               | 36 (17.9%)                  |
|                                                                         | No sample received | 132 (65.0%)              | 150 (74.6%)                 |

**Supplementary Table 8: Participants submitting data for the optional additional microbiological follow up at 18 months (six months after completion of 12-month trial period) by trial allocated group**

|                                 | n (%)      | Mean (SD)     | Median |
|---------------------------------|------------|---------------|--------|
| <b>Baseline</b>                 |            |               |        |
| <b>Prophylaxis (n = 203)</b>    |            |               |        |
| SF-36 MCS                       | 194 (95.6) | 48.68 (12.22) | 51.68  |
| SF-36 PCS                       | 193 (95.1) | 41.02 (12.12) | 41.61  |
| <b>No Prophylaxis (n = 201)</b> |            |               |        |
| SF-36 MCS                       | 187 (93.0) | 49.39 (12.05) | 52.84  |
| SF-36 PCS                       | 186 (92.5) | 40.13 (11.98) | 40.58  |
| <b>6 months</b>                 |            |               |        |
| <b>Prophylaxis (n = 203)</b>    |            |               |        |
| SF-36 MCS                       | 148 (72.9) | 49.2 (12.55)  | 53.93  |
| SF-36 PCS                       | 146 (71.9) | 39.85 (12.36) | 39.66  |
| <b>No Prophylaxis (n = 201)</b> |            |               |        |
| SF-36 MCS                       | 147 (73.1) | 46.24 (12.85) | 49.47  |
| SF-36 PCS                       | 144 (71.6) | 39.47 (12.15) | 39.23  |
| <b>12 months</b>                |            |               |        |
| <b>Prophylaxis (n = 203)</b>    |            |               |        |
| SF-36 MCS                       | 139 (68.5) | 48.06 (12.39) | 53.03  |
| SF-36 PCS                       | 137 (67.5) | 39.43 (13.07) | 38.42  |
| <b>No Prophylaxis (n = 201)</b> |            |               |        |
| SF-36 MCS                       | 137(68.2)  | 46.99 (13.08) | 51.75  |
| SF-36 PCS                       | 134 (66.7) | 39.83 (11.95) | 39.74  |

Supplementary Table 9: Mean, standard deviation (SD) and median for SF-36 mental component score (MCS) and physical component score (PCS) by study group at each time point.

|                                   | Baseline             | 6 months           | 12 months          | At time of UTI     | Area under the curve for 0-12 months unadjusted | Area under the curve for 0-12 months adjusted for utility value at time UTI |
|-----------------------------------|----------------------|--------------------|--------------------|--------------------|-------------------------------------------------|-----------------------------------------------------------------------------|
| <b>All participants (n = 404)</b> | 0.69 (0.16), n = 391 | 0.66 (0.16), n=319 | 0.64 (0.17), n=296 | 0.63 (0.19), n=314 | 0.66 (0.16), n=289                              | 0.65 (0.19), n=283                                                          |
| <b>Prophylaxis (n=203)</b>        | 0.69 (0.17), n=197   | 0.67 (0.17), n=164 | 0.64 (0.18), n=150 | 0.64 (0.17), n=159 | 0.68 (0.16), n=147                              | 0.64 (0.20), n=147                                                          |
| <b>No prophylaxis (n=201)</b>     | 0.69 (0.14), n=194   | 0.65 (0.16), n=155 | 0.64 (0.15), n=146 | 0.62 (0.20), n=155 | 0.65 (0.15), n=142                              | 0.65 (0.17), n=136                                                          |

Supplementary Table 10: Mean [standard deviation (SD)] utility values derived from participant completion of the SF-36 at baseline, 6 and 12 months and at time of symptomatic UTI by study group.



|                                                              | Prophylaxis |       |        |       | No prophylaxis |       |        |       |
|--------------------------------------------------------------|-------------|-------|--------|-------|----------------|-------|--------|-------|
|                                                              | Users       | Mean  | Median | SD    | Users          | Mean  | Median | SD    |
| Inpatient days in hospital                                   | 24          | 19.42 | 10.00  | 24.22 | 36             | 12.72 | 4.00   | 17.38 |
| Day Case admissions                                          | 38          | 13.53 | 2.00   | 41.83 | 42             | 5.29  | 2.00   | 6.87  |
| Outpatient visits                                            | 103         | 14.83 | 6.00   | 27.88 | 94             | 14.13 | 8.00   | 22.74 |
| A&E (accident and emergency) visits                          | 21          | 11.14 | 2.00   | 37.84 | 18             | 2.44  | 2.00   | 1.76  |
| GP Surgery consultations                                     | 113         | 13.22 | 8.00   | 25.22 | 120            | 10.05 | 8.00   | 7.65  |
| GP Home consultations                                        | 12          | 3.33  | 4.00   | 2.15  | 12             | 6.17  | 2.00   | 7.46  |
| Nurse Surgery consultations                                  | 94          | 8.66  | 4.00   | 21.46 | 83             | 10.36 | 4.00   | 30.58 |
| Nurse Home consultations                                     | 20          | 33.90 | 4.00   | 64.02 | 14             | 40.57 | 5.00   | 94.62 |
| GP telephone consultations                                   | 43          | 5.21  | 4.00   | 4.68  | 45             | 6.36  | 4.00   | 9.34  |
| Hospital doctor telephone consultations                      | 7           | 3.71  | 2.00   | 2.43  | 7              | 3.71  | 2.00   | 2.14  |
| Nurse telephone consultations                                | 26          | 5.54  | 3.00   | 7.38  | 27             | 5.04  | 4.00   | 5.56  |
| Telephone consultations with other health care professionals | 13          | 12.15 | 4.00   | 29.51 | 16             | 4.50  | 4.00   | 3.14  |
| GP out of hours consultations                                | 6           | 4.00  | 3.00   | 2.53  | 5              | 3.20  | 2.00   | 2.68  |
| Hospital doctor out of hours consultations                   | 1           | 4.00  | 4.00   | NA    | 4              | 1.50  | 1.00   | 1.91  |
| Nurse out of hours consultations                             | 2           | 2.00  | 2.00   | 0.00  | 8              | 4.50  | 2.00   | 5.42  |
| Out of hour consultations with other clinicians              | 1           | 12.00 | 12.00  | NA    | 5              | 1.60  | 2.00   | 1.67  |

**Supplementary Table 11: Resource use over 12 months follow-up for those with full economic data**

| Resource                                                       | Total cost (£) across the two arms - Baseline to 6 months |         |                    |                |         |                    | Total cost (£) across the two arms – 6 months to 12 months |         |                    |                |         |                    |
|----------------------------------------------------------------|-----------------------------------------------------------|---------|--------------------|----------------|---------|--------------------|------------------------------------------------------------|---------|--------------------|----------------|---------|--------------------|
|                                                                | Prophylaxis                                               |         |                    | No Prophylaxis |         |                    | Prophylaxis                                                |         |                    | No Prophylaxis |         |                    |
|                                                                | Mean                                                      | Median  | Standard Deviation | Mean           | Median  | Standard Deviation | Mean                                                       | Median  | Standard Deviation | Mean           | Median  | Standard Deviation |
| Inpatient days in hospital                                     | 5195.41                                                   | 2301.20 | 4867.04            | 3497.14        | 2301.20 | 3119.96            | 4345.30                                                    | 2301.20 | 4998.95            | 3561.53        | 1585.60 | 4857.78            |
| Day Case admissions                                            | 1100.00                                                   | 704.00  | 1177.14            | 1944.38        | 704.00  | 2191.52            | 6281.85                                                    | 704.00  | 17603.86           | 1243.73        | 704.00  | 1391.93            |
| Outpatient visits                                              | 633.27                                                    | 420.36  | 773.37             | 791.09         | 420.36  | 869.46             | 1270.63                                                    | 630.54  | 2967.08            | 1019.76        | 630.54  | 2339.55            |
| A and E visits                                                 | 411.21                                                    | 293.72  | 151.68             | 326.36         | 293.72  | 97.91              | 2327.17                                                    | 293.72  | 7071.13            | 293.72         | 293.72  | 177.12             |
| GP Surgery consultations                                       | 188.61                                                    | 144.00  | 148.61             | 221.25         | 144.00  | 163.60             | 364.32                                                     | 180.00  | 940.87             | 215.30         | 216.00  | 136.20             |
| GP Home consultations                                          | 148.20                                                    | 88.92   | 102.68             | 160.06         | 177.84  | 74.40              | 133.38                                                     | 177.84  | 86.41              | 248.98         | 88.92   | 277.42             |
| Nurse Surgery consultations                                    | 58.91                                                     | 43.20   | 81.40              | 40.72          | 21.60   | 28.19              | 76.04                                                      | 43.20   | 247.49             | 115.32         | 43.20   | 384.05             |
| Nurse Home consultations                                       | 280.00                                                    | 72.00   | 551.51             | 486.00         | 72.00   | 1032.08            | 744.92                                                     | 144.00  | 1281.96            | 609.00         | 54.00   | 1275.70            |
| GP telephone consultations                                     | 53.84                                                     | 28.80   | 36.12              | 53.88          | 28.80   | 39.87              | 68.52                                                      | 57.60   | 59.83              | 90.67          | 57.60   | 132.39             |
| Hospital doctor telephone consultations                        | 28.80                                                     | 28.80   | NA                 | 43.20          | 28.80   | 28.80              | 57.60                                                      | 43.20   | 36.43              | 67.20          | 86.40   | 33.26              |
| Nurse telephone consultations                                  | 18.51                                                     | 12.96   | 11.17              | 14.10          | 8.64    | 9.64               | 24.19                                                      | 8.64    | 31.19              | 24.59          | 17.28   | 22.54              |
| Telephone consultations with other health care professionals   | 44.00                                                     | 48.00   | 18.07              | 39.27          | 48.00   | 26.88              | 204.00                                                     | 36.00   | 451.74             | 54.00          | 60.00   | 37.95              |
| GP out of hours consultations                                  | 178.88                                                    | 134.16  | 77.46              | 134.16         | 134.16  | 0.00               | 214.66                                                     | 134.16  | 120.00             | 268.32         | 134.16  | 232.37             |
| Hospital doctor out of hours consultations                     | 0.00                                                      | 0.00    | NA                 | 210.18         | 210.18  | 210.18             | 420.36                                                     | 420.36  | NA                 | 0.00           | 0.00    | NA                 |
| Nurse out of hours consultations                               | 21.60                                                     | 21.60   | NA                 | 10.80          | 10.80   | 15.27              | 21.60                                                      | 21.60   | NA                 | 61.20          | 43.20   | 63.22              |
| Out of hour consultations with other health care professionals | 0.00                                                      | 0.00    | NA                 | 210.18         | 210.18  | 210.18             | 1261.08                                                    | 1261.08 | NA                 | 105.09         | 105.09  | 148.62             |
| Out of pocket expenses for private health care                 | 810.46                                                    | 810.46  | 863.32             | 712.00         | 340.00  | 895.63             | 1387.99                                                    | 370.16  | 2465.22            | 1185.71        | 280.00  | 1892.70            |

**Supplementary Table 12: Total costs over 12 months follow-up including all participants with full economic data**

| Outcome measure and time point                                                      | Prophylaxis<br>(included in primary analysis n = 181) |       |                | No prophylaxis<br>(included in primary analysis n = 180) |       |                |
|-------------------------------------------------------------------------------------|-------------------------------------------------------|-------|----------------|----------------------------------------------------------|-------|----------------|
|                                                                                     | N                                                     | Mean  | Std. Deviation | N                                                        | Mean  | Std. Deviation |
| SF-6D at baseline                                                                   | 178                                                   | 0.668 | 0.168          | 178                                                      | 0.663 | 0.145          |
| SF-6D at 6 months                                                                   | 137                                                   | 0.659 | 0.168          | 139                                                      | 0.644 | 0.152          |
| SF-6D at 12 month                                                                   | 127                                                   | 0.649 | 0.182          | 122                                                      | 0.643 | 0.155          |
| QALYs from baseline to 6 months                                                     | 121                                                   | 0.335 | 0.079          | 124                                                      | 0.329 | 0.069          |
| QALY from 6 to 12 months                                                            | 108                                                   | 0.333 | 0.085          | 104                                                      | 0.323 | 0.075          |
| QALY from baseline to 12 month                                                      | 96                                                    | 0.676 | 0.162          | 93                                                       | 0.652 | 0.147          |
| QALY from baseline to 6 months and utility impact of UTI and no multiple imputation | 130                                                   | 0.302 | 0.137          | 125                                                      | 0.301 | 0.127          |
| QALY from 6 to 12 months and utility impact of UTI and no multiple imputation       | 95                                                    | 0.333 | 0.088          | 78                                                       | 0.329 | 0.076          |
| QALY from baseline to 6 months and utility impact of UTI and no multiple imputation | 93                                                    | 0.641 | 0.205          | 74                                                       | 0.650 | 0.170          |

Supplementary Table 13: Comparisons of outcomes Baseline, 6 and 12 months

| <b>Data response rates</b>                            | <b>Prophylaxis<br/>(included in primary analysis n = 181)</b> | <b>No prophylaxis<br/>(included in primary analysis n = 180)</b> |
|-------------------------------------------------------|---------------------------------------------------------------|------------------------------------------------------------------|
| <b>Health utilisation</b>                             |                                                               |                                                                  |
| <b>6 months</b>                                       | 157                                                           | 152                                                              |
| <b>12 months</b>                                      | 146                                                           | 152                                                              |
| <b>Complete data 6 &amp; 12 months</b>                | 140                                                           | 131                                                              |
| <b>SF-36</b>                                          |                                                               |                                                                  |
| <b>Baseline</b>                                       | 178                                                           | 178                                                              |
| <b>6 months</b>                                       | 137                                                           | 139                                                              |
| <b>12 months</b>                                      | 127                                                           | 122                                                              |
| <b>Complete data Baseline &amp; 6 &amp; 12 months</b> | 96                                                            | 93                                                               |
| <b>WTP</b>                                            |                                                               |                                                                  |
| <b>13 months</b>                                      | 101                                                           | 97                                                               |

**Supplementary Table 14: Response rates for economic data**
